# Supplementary material for: Age-related neurogenesis decline in the subventricular zone is associated with specific cell cycle regulation changes in activated neural stem cells
Source: PubMed Central journal article supplement (PMC4759590; doi:10.1038/srep21505), 2016-02-19

# Supplementary information

## Age-related neurogenesis decline in the subventricular zone is associated with specific cell cycle regulation changes in activated neural stem cells

Mathieu Daynac<sup>1234\*</sup>, Lise Morizur<sup>1234\*</sup>, Alexandra Chicheportiche<sup>1234</sup>, Marc-André Mouchon<sup>1234</sup>, François D. Boussin<sup>1234</sup>

### Supplementary Figure Legends

**Figure S1. Decrease in total SVZ cell number with aging is associated with a disorganization of the niche.**  
(A) Evolution of the total number of cells in the SVZ during aging. (B-F) Quantification of the proportion of the main neurogenic populations relative to the total number of cells in the SVZ in mice aged 2 to 12 months. The data are represented as the mean±SEM and were obtained from at least 4 independent mice for each time point.  
\* p<0.05, \*\*p<0.01, \*\*\*p<0.001

**Figure S2. No permanent cell cycle exit at 6 months for activated NSCs and TACs.**  
Frequency of BrdU-positive LeX<sup>+</sup>EGFR<sup>+</sup> and EGFR<sup>+</sup> cells following a 14-day BrdU administration in 2- and 6-month-old mice (n=3, mean±SEM).

**Figure S3. Neurosphere formation of activated NSCs and TACs is not altered at 6 months.**  
The number of primary neurospheres was counted 7 days after plating LeX<sup>+</sup>EGFR<sup>+</sup> and EGFR<sup>+</sup> sorted cells from 2- and 6-month-old mice in the presence of EGF and FGF-2 (n=4, mean±SEM).

### Supplementary dataset legends (supplementary .xls files)

**Table S1: Overrepresentation test and related GO categories of genes enriched in aNSCs from 2 month-old vs 6 months-old mice**

**Table S2: List of genes enriched in aNSCs from 2 month-old vs 6 months-old mice**

**Figure S1**

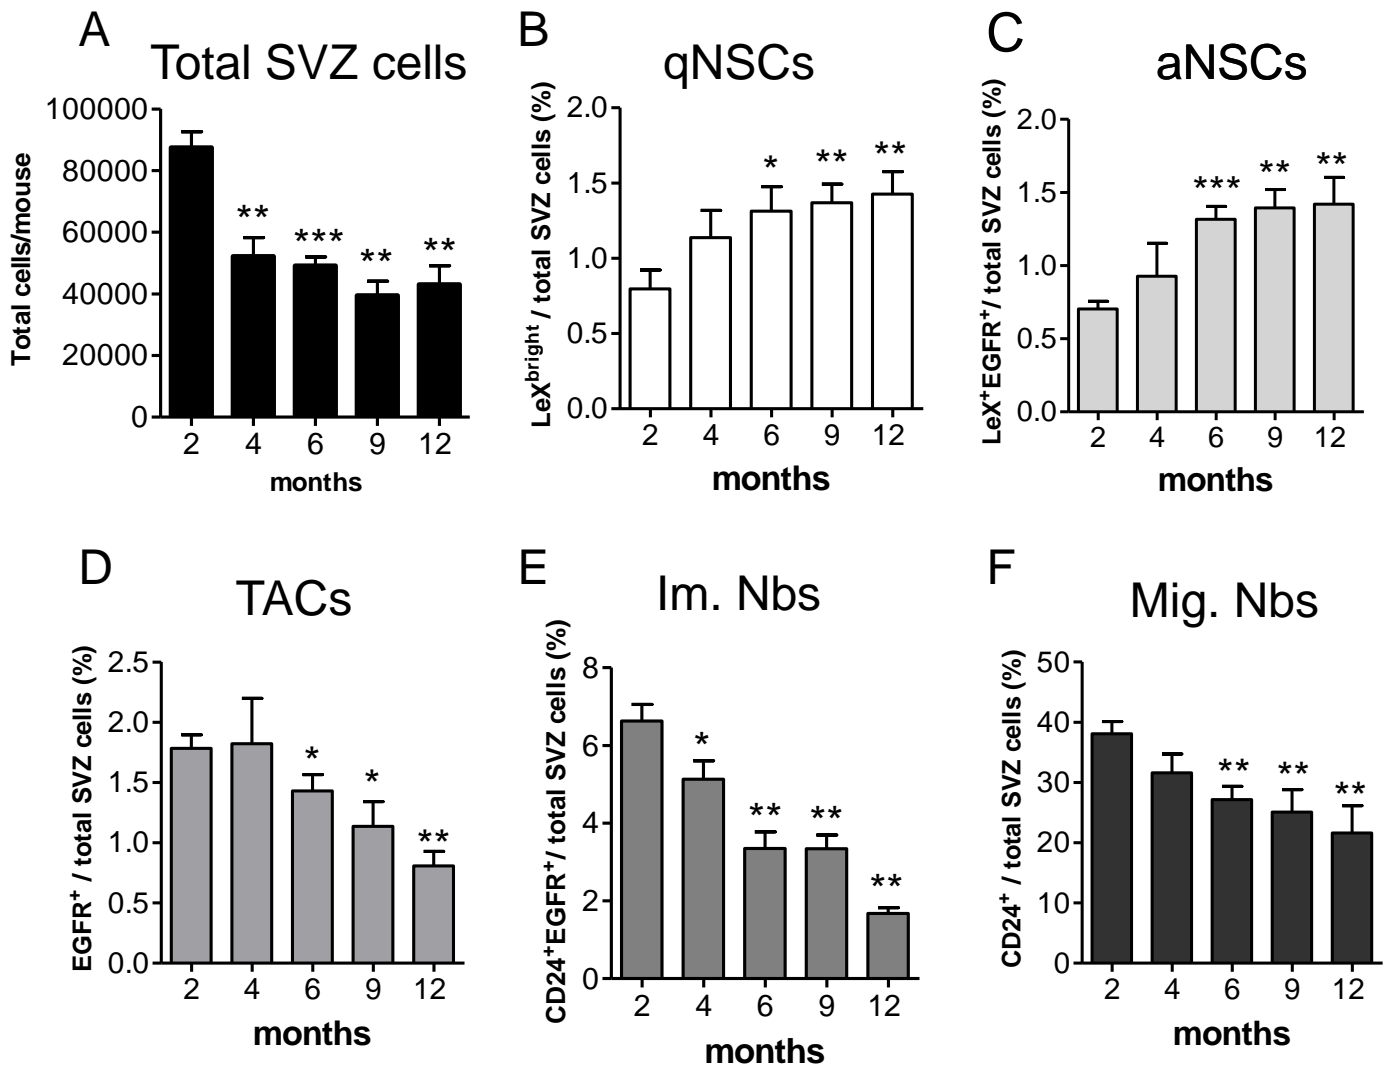

**Figure S2**

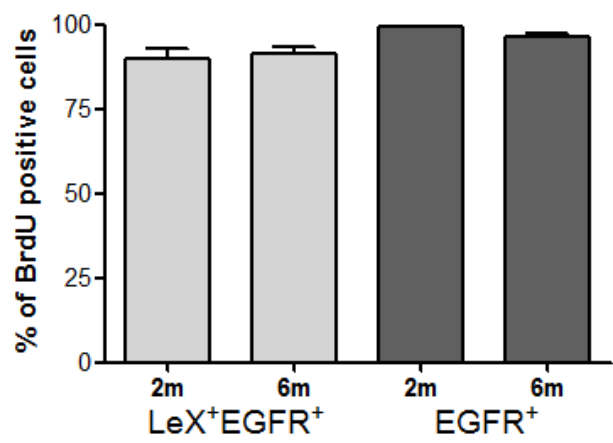

**Figure S3**

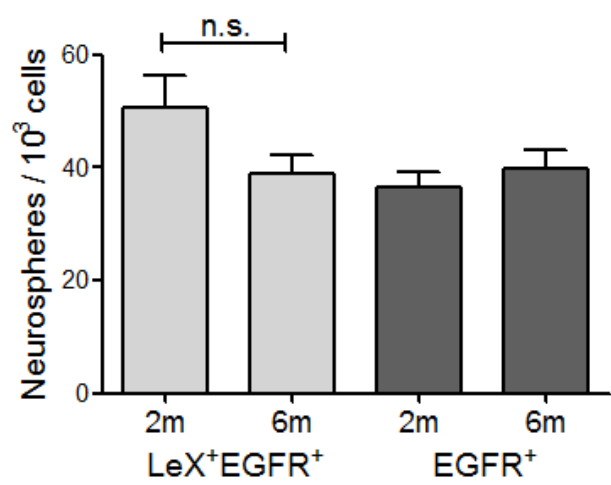

Supplement: srep21505-s1.pdf [file srep21505-s1.pdf]
